# Supplementary material
Source: PubMed Central journal article supplement (PMC4978876)
Supplement: rstb20150435supp1.pdf [file rstb20150435supp1.pdf]

**Supplementary table 1.** Analyses of deviance of the generalized linear models indicating the effects of the Cerrado deforestation and regeneration, and the net area change per municipality on welfare indicators (GDP, IDH-R e Gini Inequality Index) between 2000 and 2015. The IDH-R model was adjusted for a log link function, whereas for Gini Index and GDP models we adjusted for an identity- Gaussian link function. (n = 89 for each model).

| Response variables    | Explanatory variables              | Estimate | Deviance | DF | <i>F</i> | <i>P</i> |
|-----------------------|------------------------------------|----------|----------|----|----------|----------|
| Gini Inequality Index | Null                               |          |          | 88 |          |          |
|                       | Area lost (km <sup>2</sup> )       | - 1.712  | 224.845  | 87 | 0.918    | 0.340    |
|                       | Area gained (km <sup>2</sup> )     | + 1.703  | 34.138   | 86 | 0.139    | 0.709    |
|                       | Net area change (km <sup>2</sup> ) | - 1.706  | 25.206   | 85 | 0.103    | 0.745    |
| IDH-R                 | Null                               |          |          | 88 |          |          |
|                       | Area lost (km <sup>2</sup> )       | - 0.055  | 0.088    | 87 | 0.501    | 0.481    |
|                       | Area gained (km <sup>2</sup> )     | + 0.075  | 0.149    | 86 | 0.845    | 0.360    |
|                       | Net area change (km <sup>2</sup> ) | - 0.056  | 0.002    | 85 | 0.011    | 0.923    |
| GDP                   | Null                               |          |          | 88 |          |          |
|                       | Area lost (km <sup>2</sup> )       | + 1.048  | 38.091   | 87 | 1.366    | 0.245    |
|                       | Area gained (km <sup>2</sup> )     | - 1.056  | 0.237    | 86 | 0.008    | 0.926    |
|                       | Net area change (km <sup>2</sup> ) | + 1.083  | 101.741  | 85 | 3.648    | 0.089    |
